# Supplementary material for: Complete inhibition of liver acetyl-CoA carboxylase activity is required to exacerbate liver tumorigenesis in mice treated with diethylnitrosamine
Source: PubMed Central journal article supplement (PMC11559202; doi:10.1186/s40170-024-00363-1), 2024-11-13
Supplement: 40170_2024_363_MOESM1_ESM.pdf [file 40170_2024_363_MOESM1_ESM.pdf]

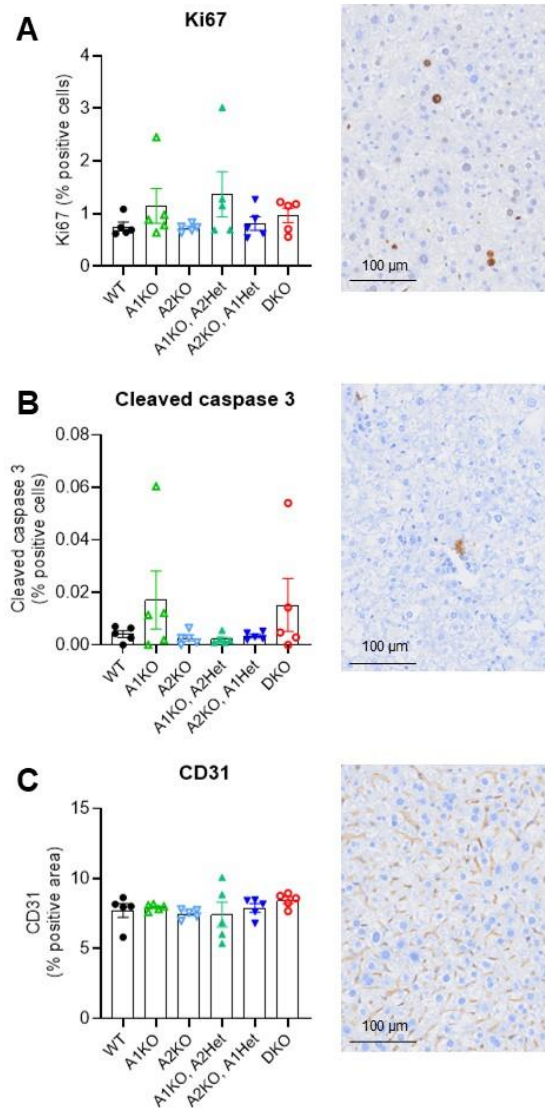

**Supplemental Figure 1: Immunohistochemistry analysis of Ki67, cleaved caspase 3 and CD31 staining in mouse livers.**

A) Ki67 staining in normal liver tissues from all genotypes. B) Cleaved caspase 3 staining in normal liver tissues from all genotypes. C) CD31 staining of normal liver tissues from all genotypes. Representative images for Ki67, cleaved caspase 3 and CD31 staining are shown next to the graphs. Brown staining shows the cells/areas positive for the respective marker.  $n = 5$  for all genotypes.
